# Supplementary material
Source: publisher site journal article supplement (https://www.spandidos-publications.com/7576/downloadSupplementary)
Supplement: Supplementary file 1 [file downloadSupplementary]

## Sheet: Table SVIII
Table SVIII. Transcriptomic Profiles of hub-FRDEGs in the training cohort (GSE185263).
Gene	GSM5608946	GSM5608947	GSM5608948	GSM5608949	GSM5608950	GSM5608951	GSM5608952	GSM5608953	GSM5608954	GSM5608955	GSM5608956	GSM5608957	GSM5608958	GSM5608959	GSM5608960	GSM5608961	GSM5608962	GSM5608963	GSM5608964	GSM5608965	GSM5608966	GSM5608967	GSM5608968	GSM5608969	GSM5608970	GSM5608971	GSM5608972	GSM5608973	GSM5608974	GSM5608975	GSM5608976	GSM5608977	GSM5608978	GSM5608979	GSM5608980	GSM5608981	GSM5608982	GSM5608983	GSM5608984	GSM5608985	GSM5608986	GSM5608987	GSM5608988	GSM5608989	GSM5608990	GSM5608991	GSM5608992	GSM5608993	GSM5608994
Ataxia telangiectasia mutated	20.2	20.24	14.43	29.8	34.57	91.32	62.67	21.51	16.66	54.89	20.68	8.842	28.27	15.69	9.11	49.88	27.55	44.49	47.68	45.21	25.91	56.05	39.45	50.18	29.38	20.18	9.827	7.326	16.5	1.913	2.914	4.487	3.237	8.303	9.481	1.81	6.952	4.698	14.64	17.27	6.046	10.17	14.43	9.683	10.37	17.4	13.35	7.536	8.016
Thioredoxin	274.9	170.6	154.9	186.6	129.6	46.44	189.7	234.4	242.5	208.8	113.7	28.24	116.5	191.6	221.5	174.5	106.3	89.79	122	230.5	165.5	90.28	96.77	147.6	84.34	92.59	106.7	228.6	78.35	31.87	32.07	89.03	121.8	88.21	85.15	33.06	256.3	68.09	103.9	74.06	134.8	131.8	179.7	100.7	125.8	173.2	309.6	113.3	102.9
Dipeptidyl peptidase 4	7.277	5.066	2.843	10.36	12.41	39.74	48.74	7.422	3.744	11.97	2.524	10.49	9.298	3.667	3.975	12.92	13.24	23.83	29.43	16.17	5.285	23.02	16.47	12.71	6.881	5.087	10.61	8.175	9.557	1.836	4.297	3.534	1.02	3.852	4.887	1.693	1.348	2.56	14.13	8.803	7.076	13.87	6.074	9.773	9	21.26	2.837	5.114	7.066
[truncated: 343 more columns]
